# Supplementary material for: The research environment of critical care in three Asian countries: A cross-sectional questionnaire survey
Source: Frontiers journal article supplement (doi:10.3389/fmed.2022.975750), 2022-09-20
Supplement: Table_1.pdf [file Table_1.pdf]

Supplemental Table 1 Comparison of factors related to research environment of the respondents between university-affiliated and community hospitals.

| Variables                                                                             | University-affiliated hospitals<br>(N = 271) | Community hospitals<br>(N = 173) |
|---------------------------------------------------------------------------------------|----------------------------------------------|----------------------------------|
| Full-text availability in the library of the hospital (%)                             |                                              |                                  |
| <i>New England Journal of Medicine</i>                                                | 78.2 (212/271)                               | 68.2 (118/173)                   |
| <i>Lancet</i>                                                                         | 73.1 (198/271)                               | 60.1 (104/173)                   |
| <i>JAMA</i>                                                                           | 72.7 (197/271)                               | 61.3 (106/173)                   |
| <i>Intensive Care Medicine</i>                                                        | 68.6 (186/271)                               | 43.4 (75/173)                    |
| <i>Critical Care Medicine</i>                                                         | 70.1 (190/271)                               | 51.4 (89/173)                    |
| <i>American Journal of Respiratory and Critical Care Medicine</i>                     | 59.8 (162/271)                               | 27.2 (47/173)                    |
| Secured time for research activities per week at the hospital (%)                     |                                              |                                  |
| Yes                                                                                   | 30.4 (70/230)                                | 14.2 (20/141)                    |
| $\geq 20$ hours                                                                       | 2.6 (6/230)                                  | 1.4 (2/141)                      |
| 10 hours $\leq$ and $< 20$ hours                                                      | 8.7 (20/230)                                 | 3.5 (5/141)                      |
| 5 hours $\leq$ and $< 10$ hours                                                       | 15.7 (36/230)                                | 7.1 (10/141)                     |
| 0 $<$ and $< 5$ hours                                                                 | 3.5 (8/230)                                  | 2.1 (3/141)                      |
| No                                                                                    | 69.6 (160/230)                               | 85.8 (121/141)                   |
| Competitive research funding as a principal investigator over the past five years (%) | 39.0 (89/228)                                | 12.1 (17/141)                    |
| Non-competitive research funding for the ICU (%)                                      | 21.3 (49/230)                                | 4.3 (6/141)                      |
| Research supporting personnel for the hospital (%)                                    | 42.4 (97/229)                                | 21.3 (30/141)                    |
| Epidemiologist                                                                        | 14.0 (38/271)                                | 7.5 (13/173)                     |
| Biostatistician                                                                       | 21.0 (57/271)                                | 13.3 (23/173)                    |
| Native English proofreader                                                            | 4.4 (12/271)                                 | 5.2 (9/173)                      |

|                                                                                            |                |               |
|--------------------------------------------------------------------------------------------|----------------|---------------|
| Research assistant                                                                         | 11.1 (30/271)  | 6.9 (12/173)  |
| Research coordinator                                                                       | 11.8 (32/271)  | 7.5 (13/173)  |
| Other                                                                                      | 0.4 (1/271)    | 0.6 (1/173)   |
| Research supporting personnel dedicated for the ICU (%)                                    | 0.4 (1/222)    | 0.6 (1/173)   |
| Access to a research ethics committee/institutional review board (IRB) at the hospital (%) | 96.1 (220/229) | 95.7 (87/94)  |
| Frequency of research ethics committee/IRB (%)                                             |                |               |
| Regularly > once in a week                                                                 | 5.9 (13/220)   | 1.5 (2/134)   |
| Regularly once in a month =< and <once in a week                                           | 50.9 (112/220) | 36.6 (49/134) |
| Regularly <once in a month                                                                 | 14.5 (32/220)  | 25.4 (34/134) |
| Held only when requested                                                                   | 8.2 (18/220)   | 17.9 (24/134) |
| Don't know                                                                                 | 20.5 (45/220)  | 18.7 (25/134) |
| How to submit for the research ethics committee/IRB in the hospital (%)                    |                |               |
| Online                                                                                     | 64.5 (142/220) | 30.6 (41/134) |
| Not online (in any media)                                                                  | 24.5 (54/220)  | 54.5 (73/134) |
| Don't know                                                                                 | 10.9 (24/220)  | 14.9 (20/134) |

---
